# Supplementary material for: Doublecortin undergo nucleocytoplasmic transport via the RanGTPase signaling to promote glioma progression
Source: PubMed Central journal article supplement (PMC7017634; doi:10.1186/s12964-019-0485-5), 2020-02-12

Supplementary Figure 6

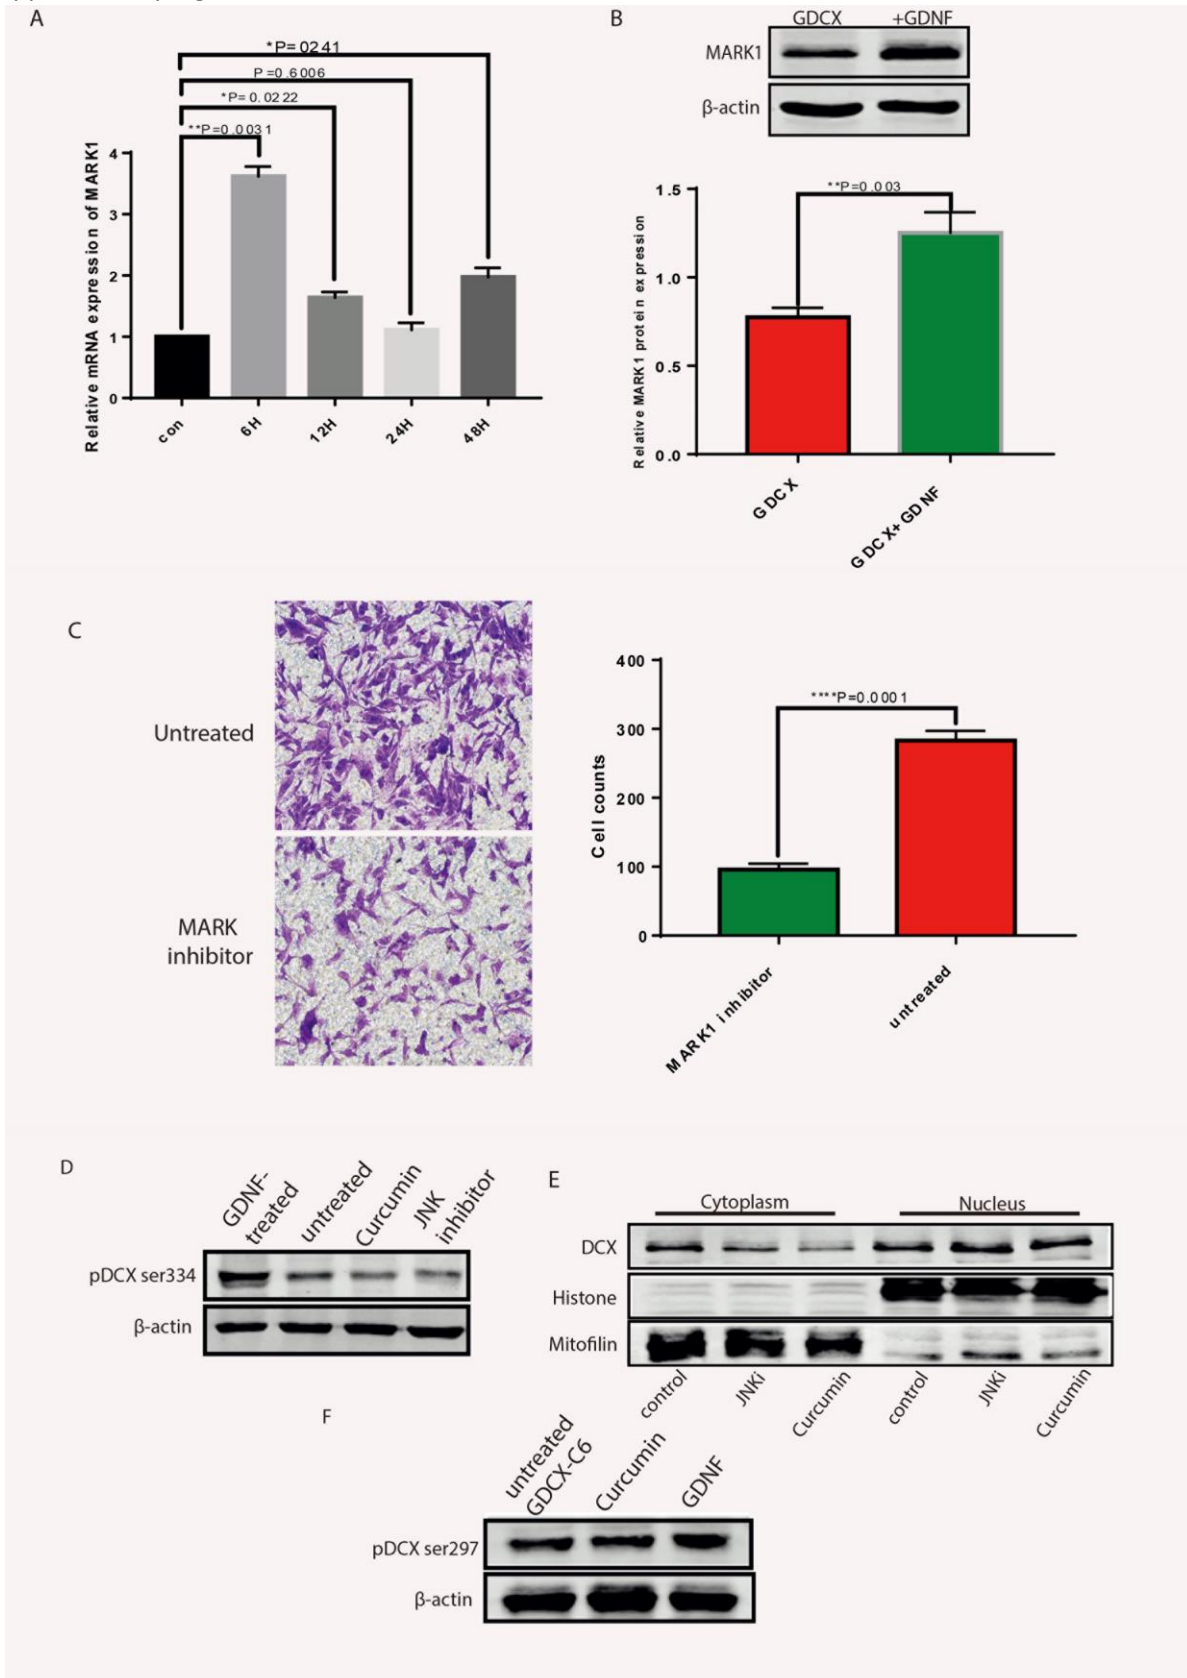

Supplement: 12964_2019_485_MOESM6_ESM.pdf [file 12964_2019_485_MOESM6_ESM.pdf]
